# Supplementary material
Source: PubMed Central journal article supplement (PMC5433349)
Supplement: NIHMS840664-supplement-1.pdf [file NIHMS840664-supplement-1.pdf]

# Supplementary Figure S1

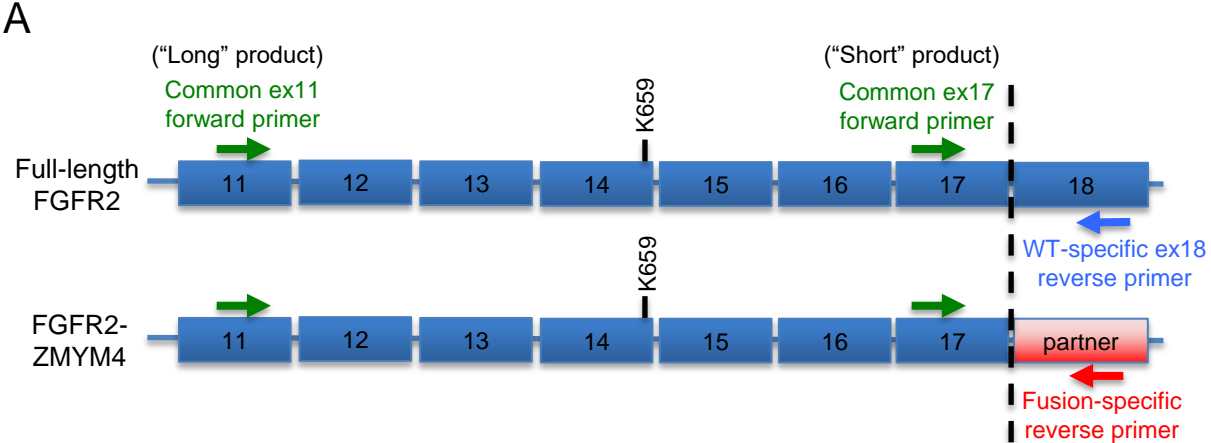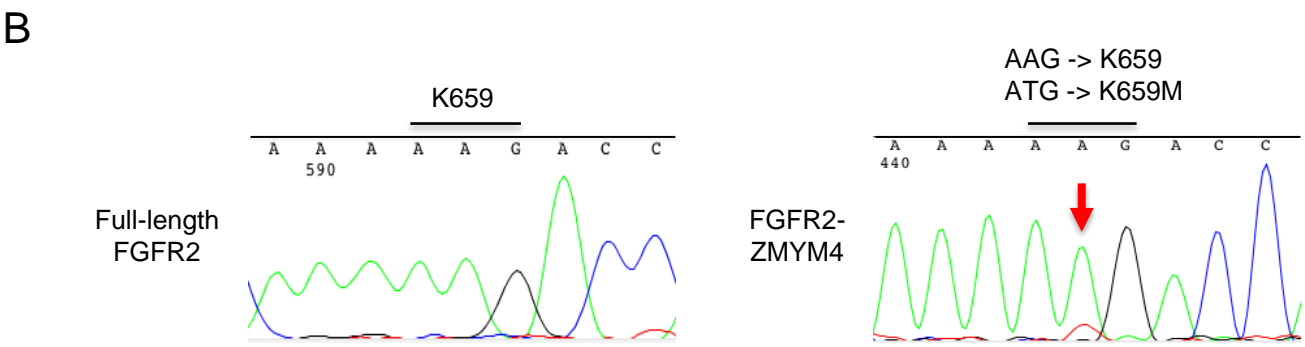

**Supplementary Figure S1. Confirmation of secondary point mutation in FGFR2-ZMYM4 allele. A.** Primers were designed to specifically amplify either full-length FGFR2 or FGFR2-ZMYM4 mRNA from post-progression biopsy tissue of Patient #1. **B.** Sequencing traces from Sanger sequencing demonstrates a K659M mutation in the FGFR2-ZMYM4 allele and not the full-length FGFR2 allele.

# Supplementary Figure S2

A

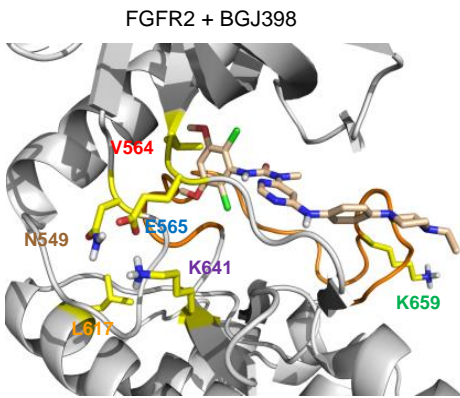

B

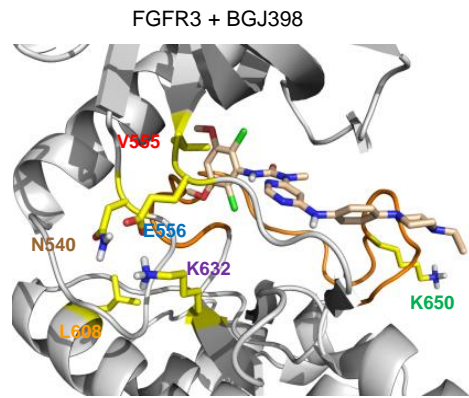

C

|              |                                                                                                     |
|--------------|-----------------------------------------------------------------------------------------------------|
| <b>FGFR2</b> | DKLTLGKPLGEGCFGQVVM AEAVGIDKDKPKEAVTVAVKMLKDDATEKDL                                                 |
|              | .:     :     :     :     :     :     :     :     :     :                                            |
| <b>FGFR3</b> | ARLTLGKPLGEGCFGQVVM AEAI GIDKDRAAKPVTVAVKMLKDDATDKDL                                                |
| <b>FGFR2</b> | SDLVSEMEMMKMIGKHKNI I <sup>549</sup> NLLGACTQDGPLYVIVE <sup>564 565</sup> YASKGNLREYLRA             |
|              | :     :     :     :     :     :     :     :     :                                                   |
| <b>FGFR3</b> | SDLVSEMEMMKMIGKHKNI I NLLGACTQGGPLYVLVEYAAKGNLREFLRA                                                |
| <b>FGFR2</b> | RRPPGMEYSYDINRVPEEQMTFKDLVSC <sup>617</sup> TYQLARGMEYLASQKCIHRDLA                                  |
|              | :     :     :     :     :     :     :     :     :                                                   |
| <b>FGFR3</b> | RRPPGLDYSFDTCKPPEEQMTFKDLVSCAYQVARGMEYLASQKCIHRDLA                                                  |
| <b>FGFR2</b> | ARNVLVTENNVM <sup>641</sup> KIADFG <sup>659</sup> LARDINNIDYYKKT <sup>659</sup> TNGRLPVKWM APEALFDR |
|              | :     :     :     :     :     :     :     :     :                                                   |
| <b>FGFR3</b> | ARNVLVTEDNVMKIADFG LARDVHNLDYYKKT TNGRLPVKWM APEALFDR                                               |
| <b>FGFR2</b> | VYTHQSDVWSFGVLMWEI FTLGGSPYPGIPVEELFKLLKEGHRMDKPANC                                                 |
|              | :     :     :     :     :     :     :     :     :                                                   |
| <b>FGFR3</b> | VYTHQSDVWSFGVLLWEI FTLGGSPYPGIPVEELFKLLKEGHRMDKPANC                                                 |
| <b>FGFR2</b> | TNELYMMRDCWHAVPSQRPTFKQLVEDLDRILTLTNEE                                                              |
|              | :    :    :    :    :    :    :    :    :    :    :                                                 |
| <b>FGFR3</b> | THDLYMIMRECWHAAAPSQRPTFKQLVEDLDRVLTVTSTDE                                                           |

## Supplemental Figure S2: Homology between FGFR2 and FGFR3 proteins

**A and B.** *In silico* model of wild-type FGFR2 (**A**) and FGFR3 (**B**) bound to BGJ398 with relevant amino acids highlighted and color-coded. **C.** Sequence alignment of FGFR2 and FGFR3 indicating sites of specific changes in amino acids due to FGFR kinase mutations.

# Supplementary Figure S3

A

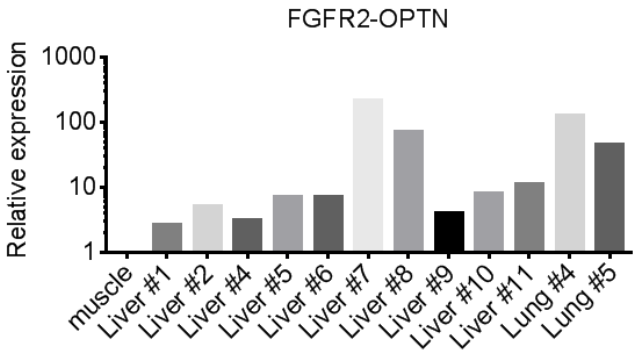

B

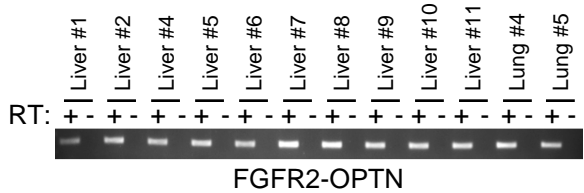

**Supplementary Figure S3. FGFR2-OPTN fusion detected in all autopsy lesions.**

**A.** Relative expression of the *FGFR2-OPTN* fusion in the indicated autopsy lesions as measured by real-time quantitative PCR (RT-qPCR). **B.** PCR product isolated from **A**, in the presence or absence of reverse transcriptase (RT), was resolved on an agarose gel.

# Supplementary Figure S4

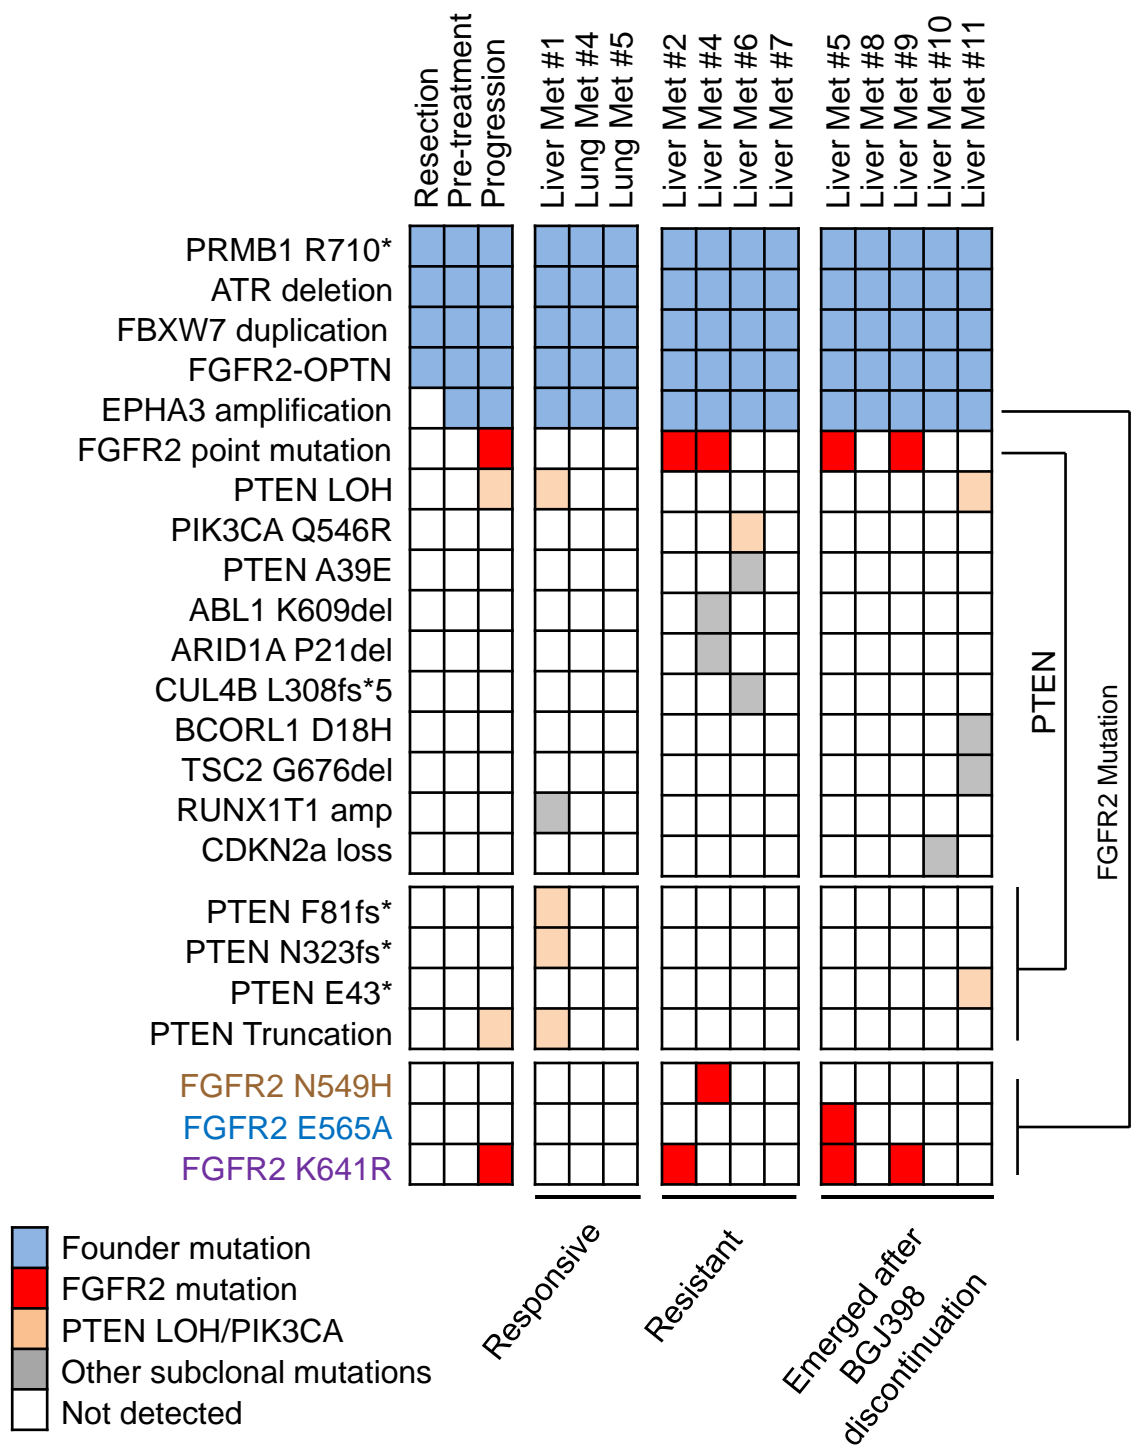

**Supplementary Figure S4. FoundationOne analysis of autopsy lesions**

Heatmap indicating all genetic events identified in the indicated Patient #2 lesions. Gray boxes indicate mutations of undetermined significance.

# Supplementary Figure S5

A

Patient #2, Post-Progression Biopsy: FoundationOne analysis

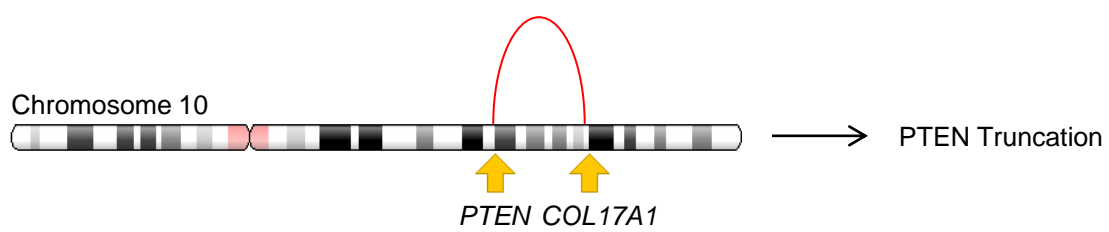

B

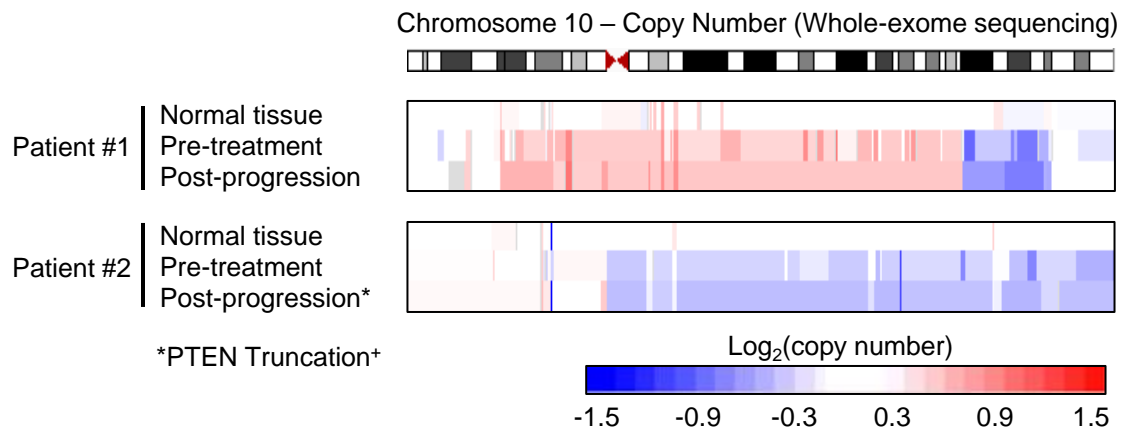

## Supplementary Figure S5. *PTEN* loss of heterozygosity (LOH) identified in Patient #2.

**A.** Intrachromosomal fusion event detected by FoundationOne assay in the post-progression biopsy sample from patient #2 and leading to *PTEN* LOH. **B.** Heatmap illustrating the relative copy number along chromosome 10 in normal tissue, pre-treatment and post-progression biopsies from Patient #1 and Patient #2 as determined by WES. Note: Patient #2 demonstrates loss of the entire long arm of chromosome 10q as an early event (pre-treatment).

# Supplementary Figure S6

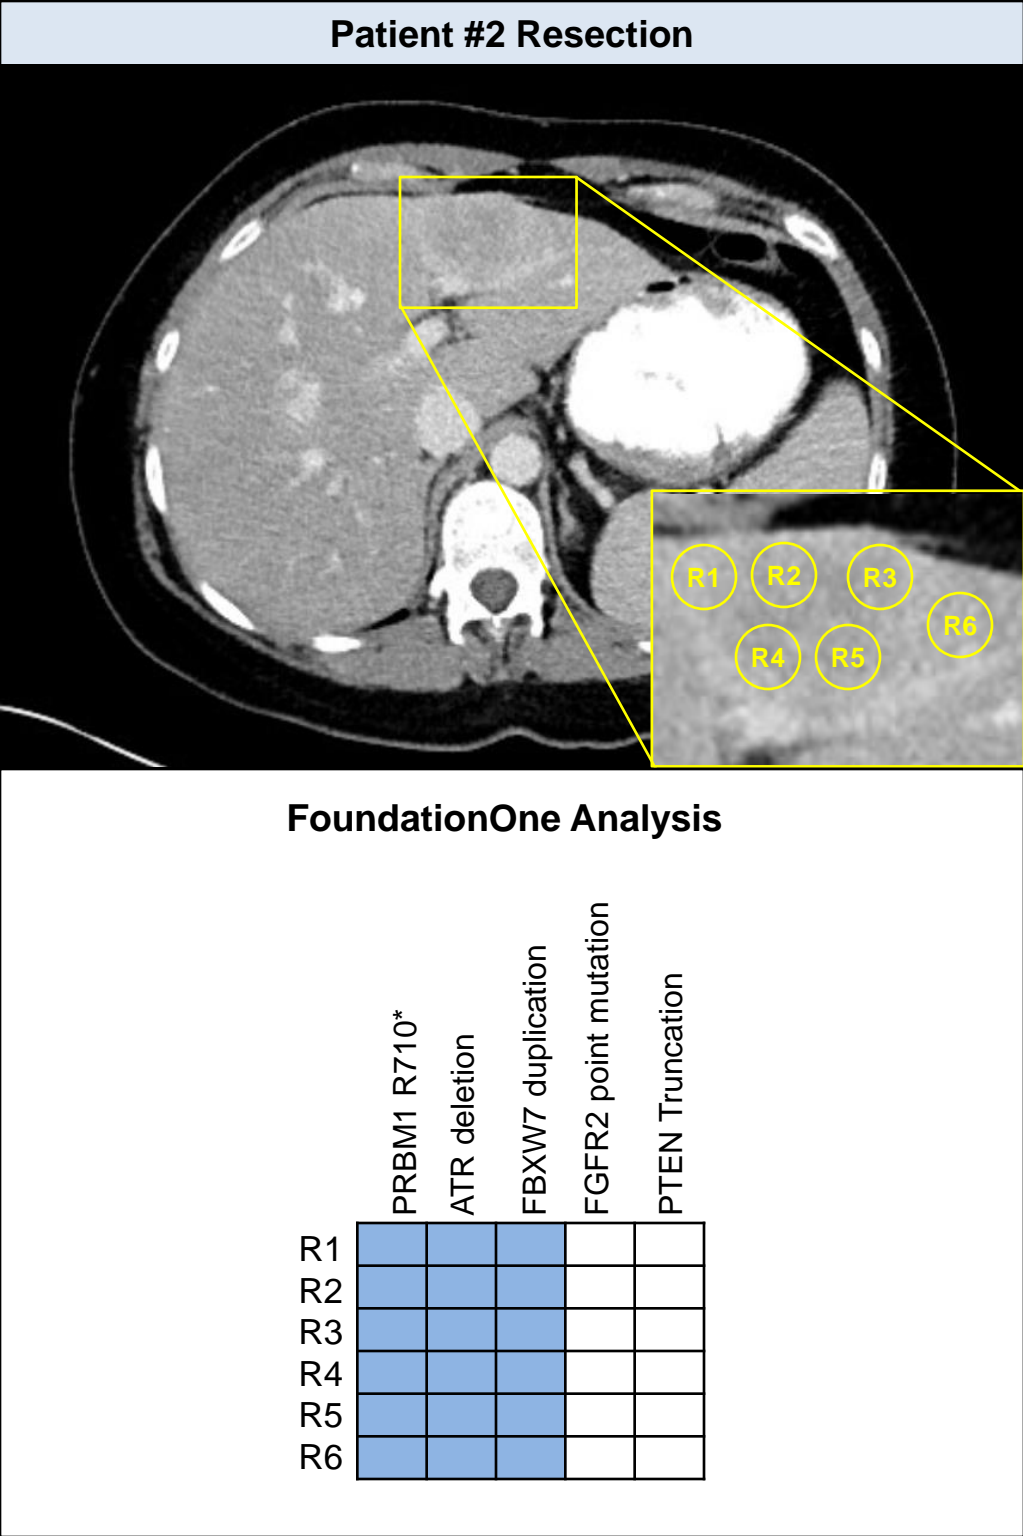

**Supplementary Figure S6. Mutational analysis of original resection specimen from Patient #2.** *Top panel*, Axial contrast enhanced CT image of resected lesion from Patient #2. *Bottom panel*, Heatmap illustrating detected mutations in six spatially distinct pieces isolated from the resection specimen by FoundationOne assay.
